# Supplementary material for: Seed Detection and Discrimination by Ground Beetles (Coleoptera: Carabidae) Are Associated with Olfactory Cues
Source: PLoS One. 2017 Jan 20;12(1):e0170593. doi: 10.1371/journal.pone.0170593 (PMC5249171; doi:10.1371/journal.pone.0170593)
Supplement: S4 File — (XLSX) [file pone.0170593.s004.xlsx]

## Sheet: Pmel-two choice-Imb vs dry
Choice between dry and imbibed seeds of volunteer canola by P. melanarius adults
sr no	Species	choice
1	Pmel	imbvc
2	Pmel	dryvc
3	Pmel	dryvc
4	Pmel	dryvc
5	Pmel	dryvc
6	Pmel	dryvc
7	Pmel	dryvc			imbvc= imbibed seeds of volunteer canola
8	Pmel	imbvc			dryvc= drys seeds of volunteer canola
9	Pmel	imbvc
10	Pmel	imbvc
11	Pmel	imbvc
12	Pmel	imbvc
13	Pmel	imbvc
14	Pmel	imbvc
15	Pmel	imbvc
16	Pmel	imbvc
17	Pmel	imbvc
18	Pmel	imbvc
19	Pmel	imbvc
20	Pmel	dryvc
21	Pmel	imbvc
22	Pmel	imbvc
23	Pmel	imbvc
24	Pmel	imbvc
25	Pmel	imbvc
26	Pmel	imbvc
27	Pmel	dryvc
28	Pmel	imbvc
29	Pmel	imbvc
30	Pmel	imbvc
31	Pmel	imbvc
32	Pmel	imbvc
33	Pmel	imbvc
34	Pmel	dryvc
35	Pmel	imbvc
36	Pmel	dryvc
37	Pmel	dryvc
38	Pmel	dryvc
39	Pmel	dryvc
40	Pmel	imbvc

## Sheet: Alit-two choice-imb vs dry
Choice between dry and imbibed seeds of volunteer canola by A.littoralis adults
sr no	Species	choice
1	alit	imbvc
2	alit	imbvc
3	alit	imbvc
4	alit	imbvc
5	alit	imbvc			imbvc= imbibed seeds of volunteer canola
6	alit	imbvc			dryvc= drys seeds of volunteer canola
7	alit	imbvc
8	alit	imbvc
9	alit	imbvc
10	alit	imbvc
11	alit	imbvc
12	alit	dryvc
13	alit	dryvc
14	alit	dryvc
15	alit	dryvc
16	alit	imbvc
17	alit	imbvc
18	alit	imbvc
19	alit	imbvc
20	alit	imbvc
21	alit	imbvc
22	alit	imbvc
23	alit	imbvc
24	alit	imbvc
25	alit	imbvc
26	alit	imbvc
27	alit	imbvc
28	alit	imbvc
29	alit	imbvc
30	alit	imbvc
31	alit	imbvc
32	alit	imbvc
33	alit	imbvc
34	alit	imbvc
35	alit	imbvc
36	alit	imbvc
37	alit	dryvc
38	alit	dryvc
39	alit	dryvc
40	alit	dryvc

## Sheet: Haff-two choice-imb v dry
Choice between dry and imbibed seeds of volunteer canola by H.affinis adults
sr no	Species	choice
1	haff	imbvc
2	haff	imbvc
3	haff	imbvc
4	haff	imbvc		imbvc= imbibed seeds of volunteer canola
5	haff	imbvc		dryvc= drys seeds of volunteer canola
6	haff	imbvc
7	haff	imbvc
8	haff	imbvc
9	haff	imbvc
10	haff	imbvc
11	haff	imbvc
12	haff	imbvc
13	haff	imbvc
14	haff	imbvc
15	haff	imbvc
16	haff	imbvc
17	haff	imbvc
18	haff	imbvc
19	haff	imbvc
20	haff	imbvc
21	haff	imbvc
22	haff	imbvc
23	haff	imbvc
24	haff	imbvc
25	haff	imbvc
26	haff	imbvc
27	haff	imbvc
28	haff	imbvc
29	haff	dryvc
30	haff	dryvc
31	haff	dryvc
32	haff	dryvc
33	haff	dryvc
34	haff	dryvc
35	haff	dryvc
36	haff	dryvc
37	haff	dryvc
38	haff	dryvc
39	haff	dryvc
40	haff	dryvc
